# Supplementary material for: Invasive Infections with Nannizziopsis obscura Species Complex in 9 Patients from West Africa, France, 2004–2020
Source: PubMed Central journal article supplement (PMC7454062; doi:10.3201/eid2609.200276), 2020-09
Supplement: 20-0276-Techapp-s1.pdf [file 20-0276-Techapp-s1.pdf]

# Invasive Infections with *Nannizziopsis obscura* Species Complex in 9 Patients from West Africa, France, 2004–2020

## Appendix

### Materials and Methods

#### Molecular Characterization and Phylogenetic Analysis

For the genomic DNA extraction  $\approx 100$  mg of mycelium from a 5 day-old PDA culture at 30°C was suspended in 700  $\mu$ L of ATL lysing solution (Qiagen, Germantown, MD, USA) containing 500  $\mu$ L of ceramic beads, and disrupted on a MAGNA Lyser (Roche Diagnostics, Mannheim, Germany) instrument (three runs of 30s at 7,000 rpm). DNA was then purified using NucleoMag Plant (Macherey-Nagel, Düren, Germany) and the semi-automated KingFisher Flex magnetic particle processor (Thermo Fisher Scientific, Vantaa, Finland). Sequencing of PCR ITS, LSU and actin products was performed at Eurofins sequencing facility by using the cycle sequencing technology (dideoxy chain termination / cycle sequencing) on ABI 3730XL sequencing machines (Applied Biosystems). Consensus sequences were determined using the Sequencher version 5.4.6 sequence analysis software (Gene Codes Corporation, Ann Arbor, MI USA). Preliminary sequence similarity searching (BLASTn) was performed against curated fungal reference databases available at the online MycoBank database (<http://www.mycobank.org/>) and the NCBI GenBank (<http://www.ncbi.nlm.nih.gov>). Multiple sequence alignments were carried out using MAFFT v.7.308 with Geneious v11.0.5 with default settings. Single gene phylogenies for all three loci and estimation of the best substitution models were inferred using were inferred using MEGA7. The concatenated alignment was submitted to Neighbor joining (NJ) analysis using MEGA7 (1) and to Maximum likelihood (ML) analysis in the web server NGPhylogeny.fr. For NJ analyses of the combined dataset, the substitution model applied was Tajima-Nei method with a gamma distribution. Robustness of the branches was assessed by bootstrap analysis with 1000 replicates. For ML tree construction, the selected model

by Smart Model Selection (SMS) was GTR general time-reversible model according Akaike Information Criterion (AIC) test criterion. Internal branch reliability was assessed using the aLRT test (SH-Like) (2).

**Appendix Table.** GenBank accession numbers for the *Nannizziopsis obscura* species complex sequences reported in this study and those available in the literature

| Patient no. (strain no. or reference) | GenBank accession numbers |          |          |
|---------------------------------------|---------------------------|----------|----------|
|                                       | ITS2                      | LSU      | Actin    |
| P1 (CNRMA4.1162)                      | MN982937                  | MN982951 | MT024770 |
| P2 (CNRMA 9.1232)                     | MN982938                  | MN982952 | MT024771 |
| P3 (CNRMA17.78)                       | MN982939                  | MN982953 | MT024772 |
| P4 (CNRMA17.507)                      | MN982940                  | MN982954 | MT024773 |
| P5 (CNRMA18.682)                      | MN982941                  | MN982955 | MT024774 |
| P6 (CNRMA18.740)                      | MN982942                  | MN982956 | MT024775 |
| P7 (CNRMA19.38)                       | MN982943                  | MN982957 | MT024776 |
| P8 (CNRMA19.607)                      | MN982944                  | MN982958 | MT024777 |
| P9 (CNRMA20.123)                      | MT345076                  | MT341813 | MT350285 |
| Stilwell, 1984 (3)                    | NR111878                  | NA       | NA       |
| Steiniger 2005 (4)                    | HF547869                  | HF547853 | HF547877 |
| Baggott 2017 (5)                      | NA                        | NA       | NA       |
| Nourrisson 2018 (6)                   | KY771168                  | NA       | NA       |
| Nourrisson 2018 (6)                   | KY771169                  | NA       | NA       |

## References

1. Kumar S, Stecher G, Tamura K. MEGA7: Molecular Evolutionary Genetics Analysis version 7.0 for bigger datasets. *Mol Biol Evol.* 2016;33:1870–4. [PubMed](https://doi.org/10.1093/molbev/msw054)  
<https://doi.org/10.1093/molbev/msw054>
2. Anisimova M, Gascuel O. Approximate likelihood-ratio test for branches: a fast, accurate, and powerful alternative. *Syst Biol.* 2006;55:539–52. [PubMed](https://doi.org/10.1080/10635150600755453)  
<https://doi.org/10.1080/10635150600755453>
3. Stillwell WT, Rubin BD, Axelrod JL. *Chrysosporium*, a new causative agent in osteomyelitis. A case report. *Clin Orthop Relat Res.* 1984; (184):190–2. [PubMed](https://doi.org/10.3201/eid1102.040915)
4. Steininger C, van Lunzen J, Sobottka I, Rohde H, Horstkotte MA, Stellbrink H-J. Mycotic brain abscess caused by opportunistic reptile pathogen. *Emerg Infect Dis.* 2005;11:349–50. [PubMed](https://doi.org/10.3201/eid1102.040915)  
<https://doi.org/10.3201/eid1102.040915>
5. Baggott A, McGann H, Barton R, Ratner J. Disseminated *Nannizziopsis obscura* infection in a renal transplant patient—the first reported case. *Med Mycol Case Rep.* 2017;17:20–4. [PubMed](https://doi.org/10.1016/j.mmcr.2017.06.002)  
<https://doi.org/10.1016/j.mmcr.2017.06.002>
6. Nourrisson C, Vidal-Roux M, Cayot S, Jacomet C, Bothorel C, Ledoux-Pilon A, et al. Invasive infections caused by *Nannizziopsis* spp. molds in immunocompromised patients. *Emerg Infect Dis.* 2018;24:549–52. [PubMed](https://doi.org/10.3201/eid2403.170772) <https://doi.org/10.3201/eid2403.170772>
